# Supplementary material for: The structure of H2TiO3—a short discussion on “Lithium recovery from salt lake brine by H2TiO3”
Source: Royal Society of Chemistry journal article supplement (doi:10.1039/c4dt03689a), 2015-01-01
Supplement: c4dt03689a1.pdf [file c4dt03689a1.pdf]

## Supplementary Information

### On the structure of $\text{H}_2\text{TiO}_3$ —a short discussion on “Lithium recovery from salt lake brine by $\text{H}_2\text{TiO}_3$ ”

Cheng-Long Yu,\*<sup>a</sup> Fei Wang,<sup>a</sup> Shu-Yao Cao,<sup>a</sup> Dan-Peng Gao,<sup>a</sup> Huai-Bing Hui,<sup>a, b</sup>

Ying-Yan Guo<sup>c</sup> and Dao-Yi Wang<sup>a</sup>

(<sup>a</sup> School of Materials Science and Engineering, Shaanxi University of Science & Technology, Xi'an 710021, China; <sup>b</sup> Technology Research Institute, Technical Center at Dongfeng Commercial Vehicle Company Limited, Wuhan 430056, China; <sup>c</sup> College of Resources and Environment, Shaanxi University of Science & Technology, Xi'an 710021, China)

\* To whom correspondence should be addressed.

**Address:** School of Materials Science and Engineering, Shaanxi University of Science & Technology, Weiyang District, Xi'an City, Shaanxi Province, 710021, China;

**E-mail:** johnyucl@aliyun.com (Prof. C.-L. Yu);

**Tel.:** +86-29-86168688;

**Fax:** +86-29-86168688.

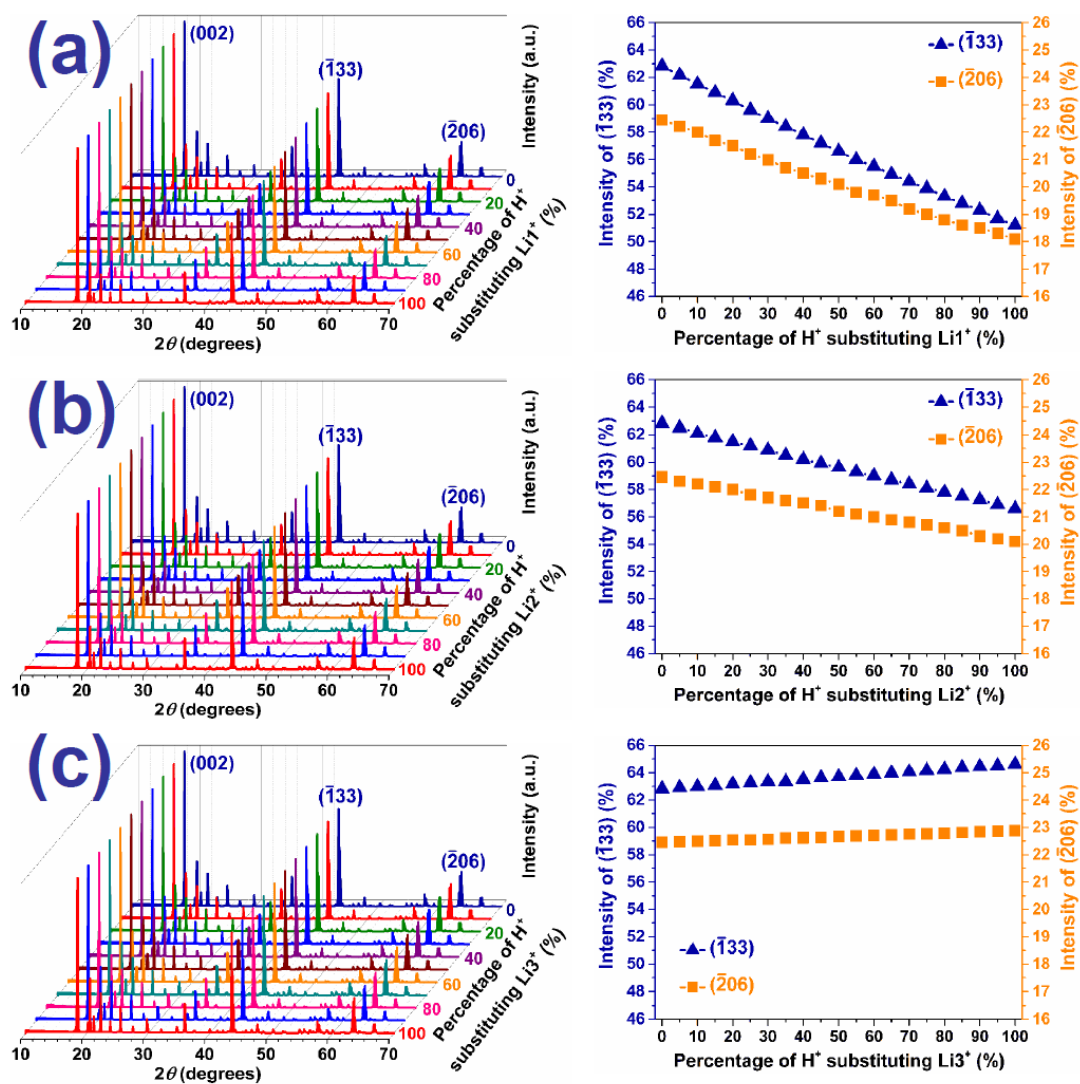

Fig. S1 Simulated XRD patterns of  $\text{Li}_2\text{TiO}_3$  (left column) and the relative intensity variation of peak  $(\bar{1}33)$  and peak  $(\bar{2}06)$  by substitution of  $\text{Li}^+$  with  $\text{H}^+$  (right column): (a)  $\text{H}^+$  substituting  $\text{Li}1^+$  from 0% to 100%; (b)  $\text{H}^+$  substituting  $\text{Li}2^+$  from 0% to 100%; (c)  $\text{H}^+$  substituting  $\text{Li}3^+$  from 0% to 100%.

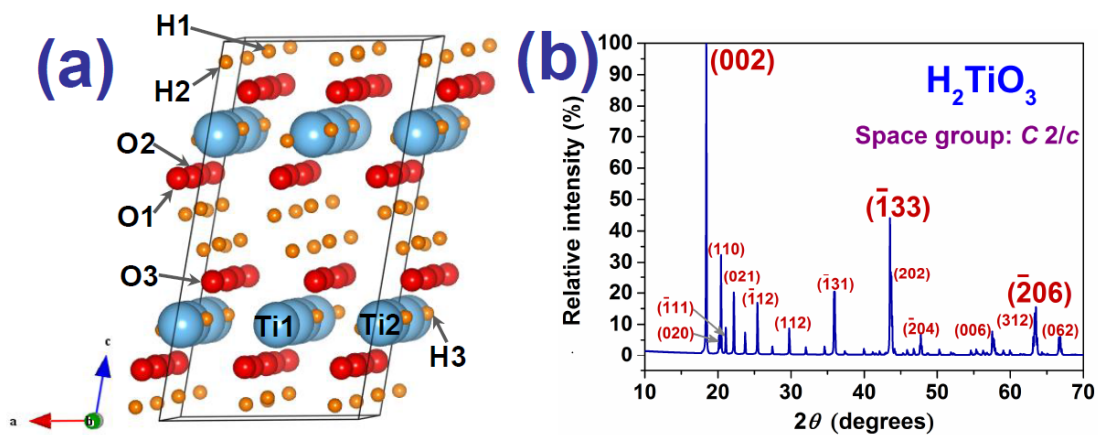

Fig. S2 The structure of  $\text{H}_2\text{TiO}_3$  with reasonable OH bond length (a), the small orange, large blue and medium red balls correspond to H, Ti, and O atoms; and the simulated XRD pattern (b). Note that the intensity of peak  $(\bar{1}33)$  and that of peak  $(\bar{2}06)$  decrease by 19 % and 7 % compared with that of  $\text{Li}_2\text{TiO}_3$ , respectively.

Table S1. Atomic coordinates and equivalent isotropic displacement parameters ( $\text{\AA}^2$ ) for  $\text{H}_2\text{TiO}_3$ .

| Atom | $x$         | $y$         | $z$        | $U_{\text{eq}}$ |
|------|-------------|-------------|------------|-----------------|
| H1   | 0.13958     | 0.90588     | 0.03568    | 0.0147(10)      |
| H2   | 0           | 0.26356     | 0.4434     | 0.0161(15)      |
| H3   | 0.10555     | 0.58444     | 0.23604    | 0.0040(8)       |
| Ti1  | 0           | 0.41749     | 0.25       | 0.00581(6)      |
| Ti2  | 0           | 0.74971(6)  | 0.25       | 0.00575(7)      |
| O1   | 0.14116(15) | 0.26356(12) | 0.13720(7) | 0.0054(2)       |
| O2   | 0.10555(14) | 0.58444(16) | 0.13719(7) | 0.00549(18)     |
| O3   | 0.13958(15) | 0.90588(14) | 0.13454(7) | 0.0056(2)       |
